# Supplementary material for: Organocatalytic oxa-Diels–Alder reaction of α,β-unsaturated ketones under non-classical conditions
Source: Royal Society of Chemistry journal article supplement (doi:10.1039/c4nj02361g), 2015-01-01

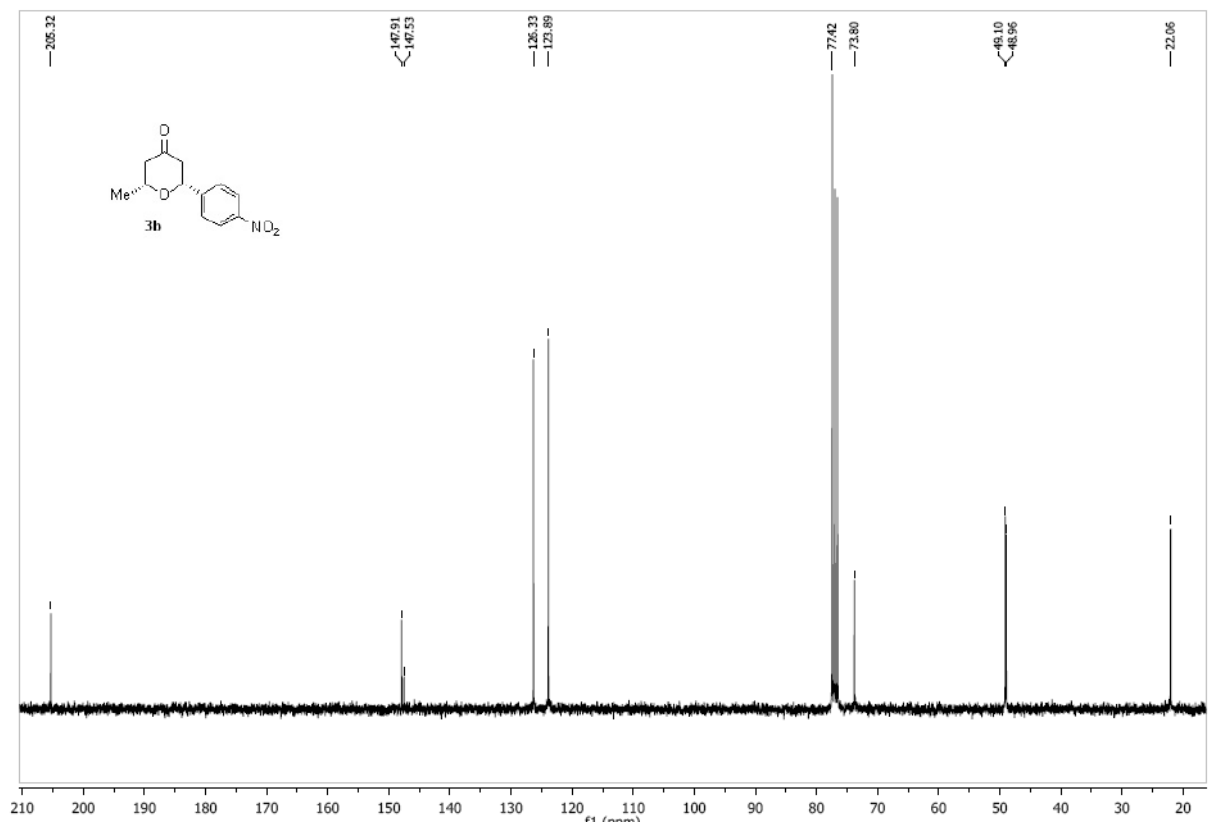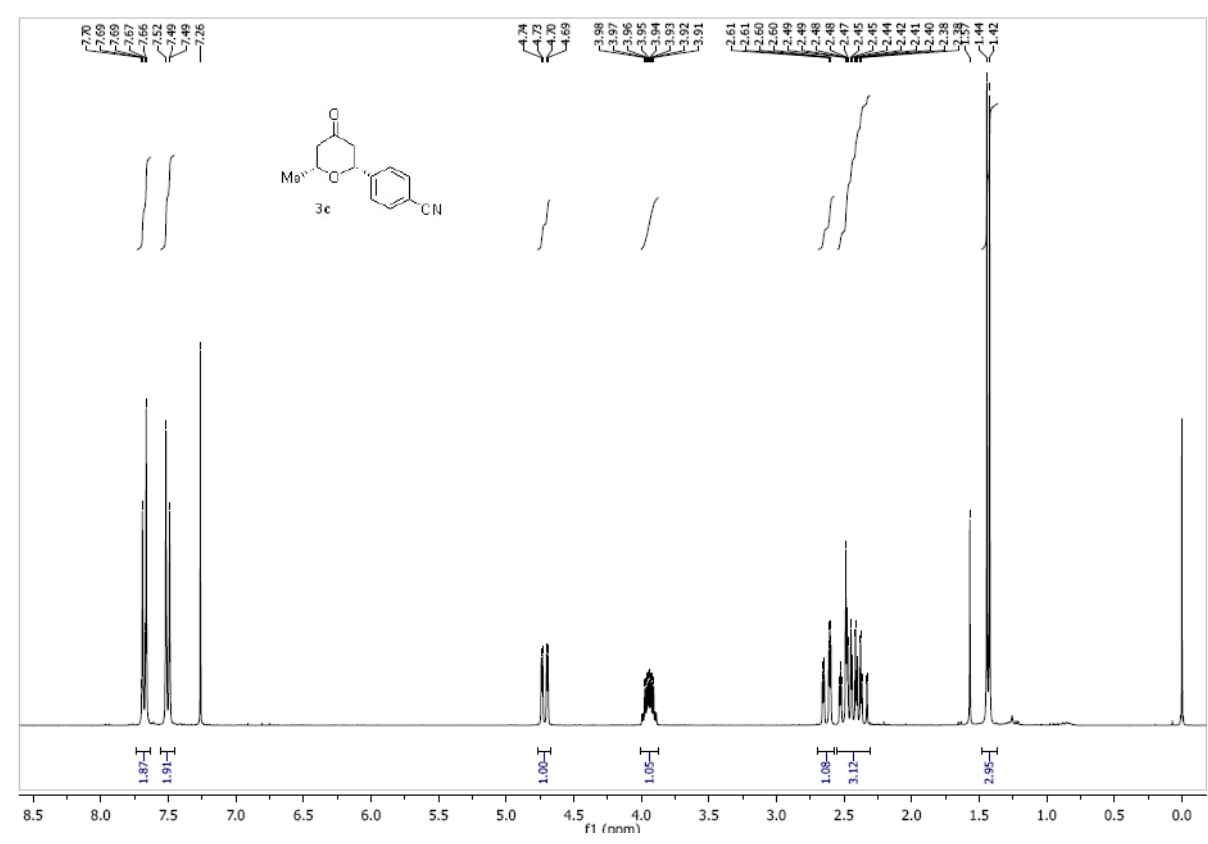

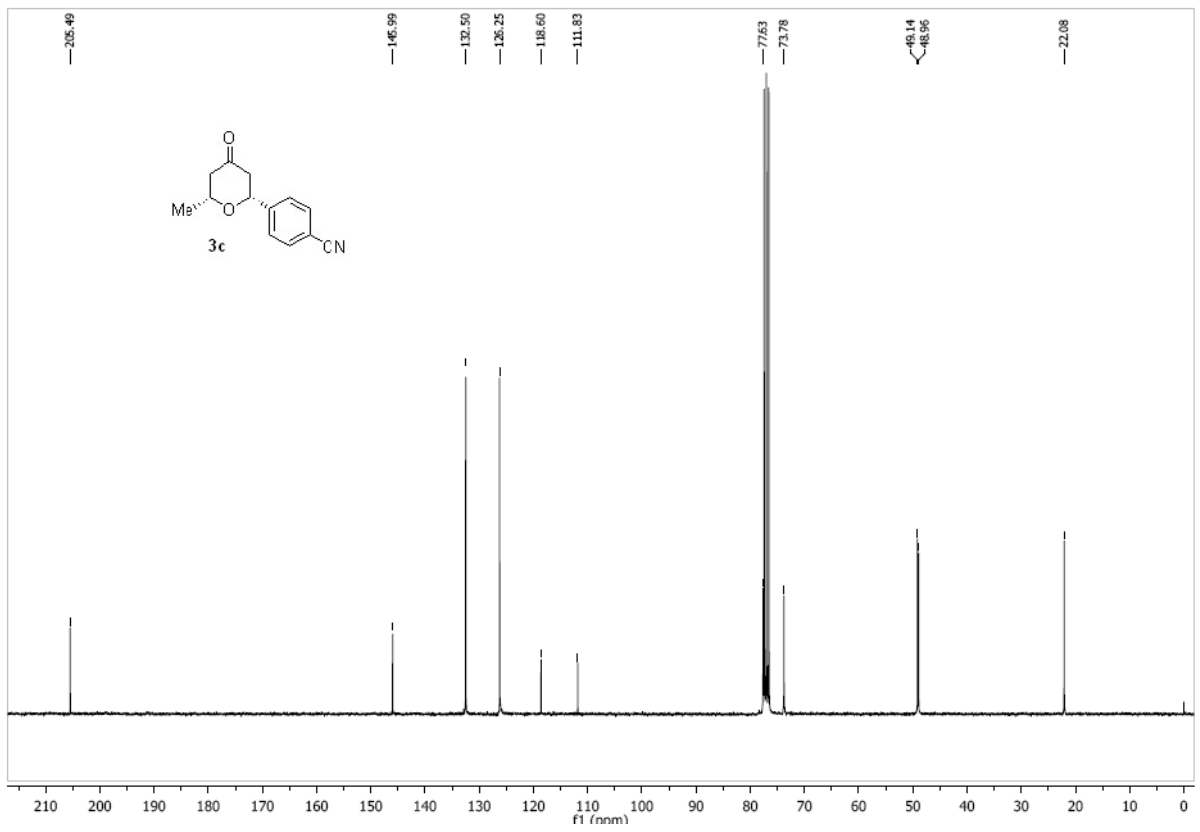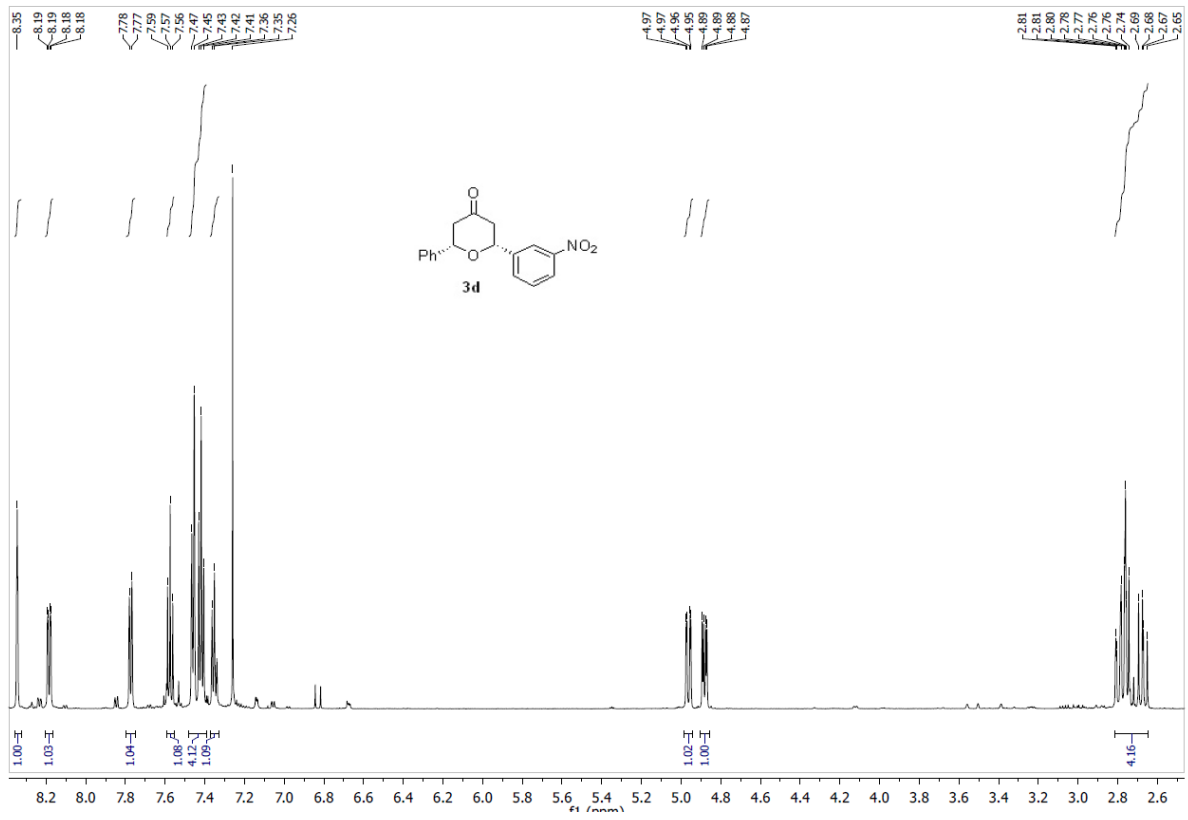

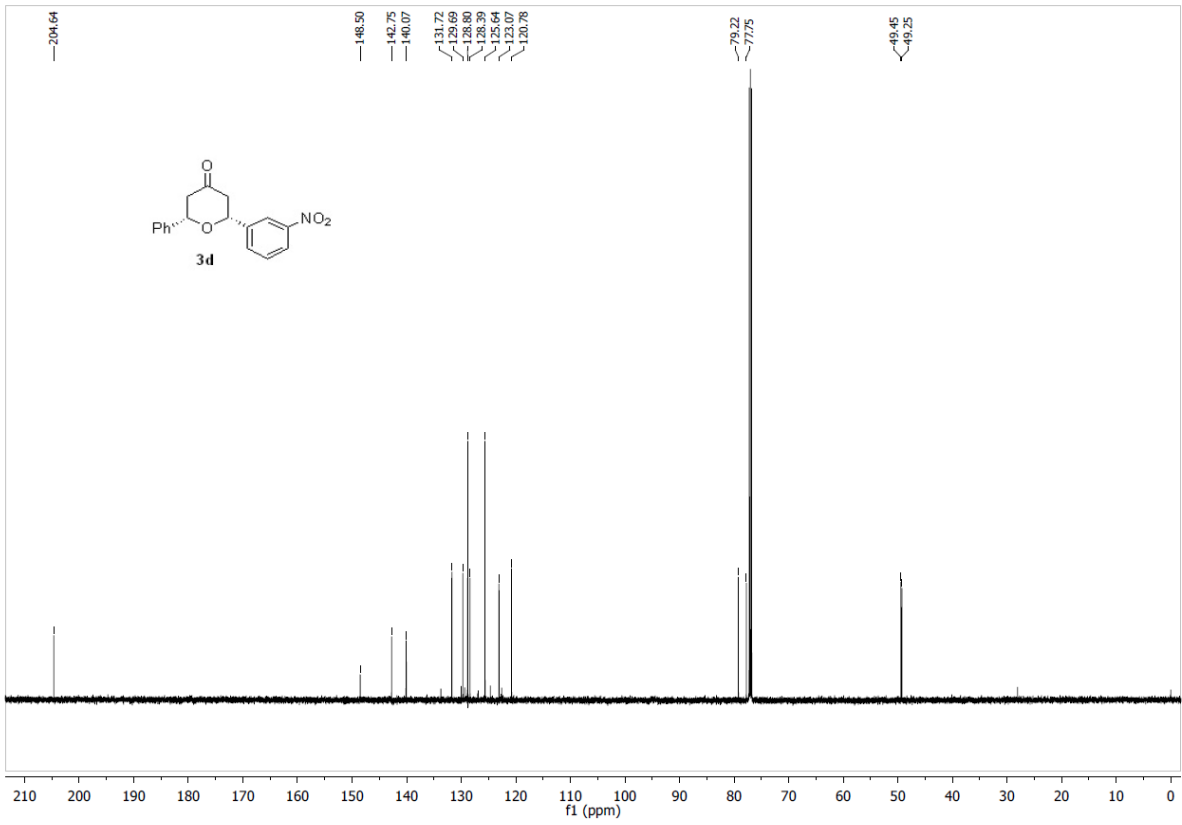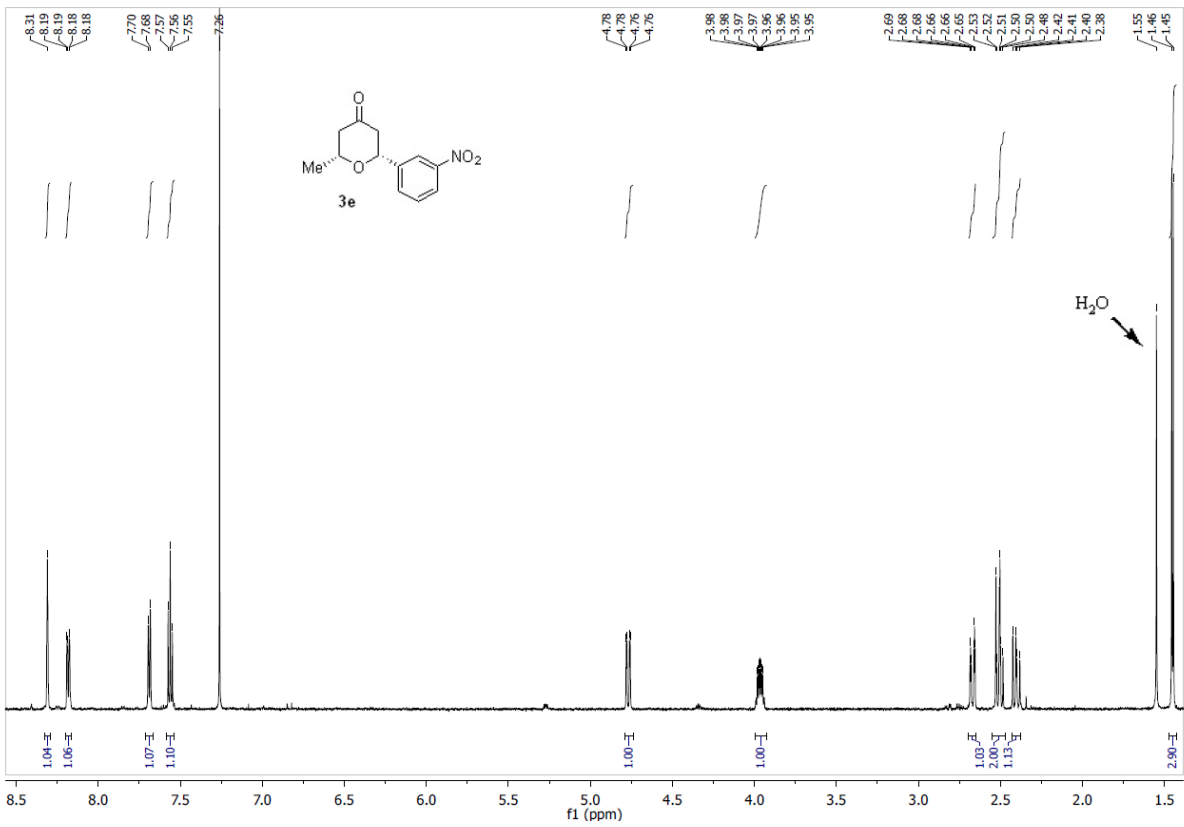

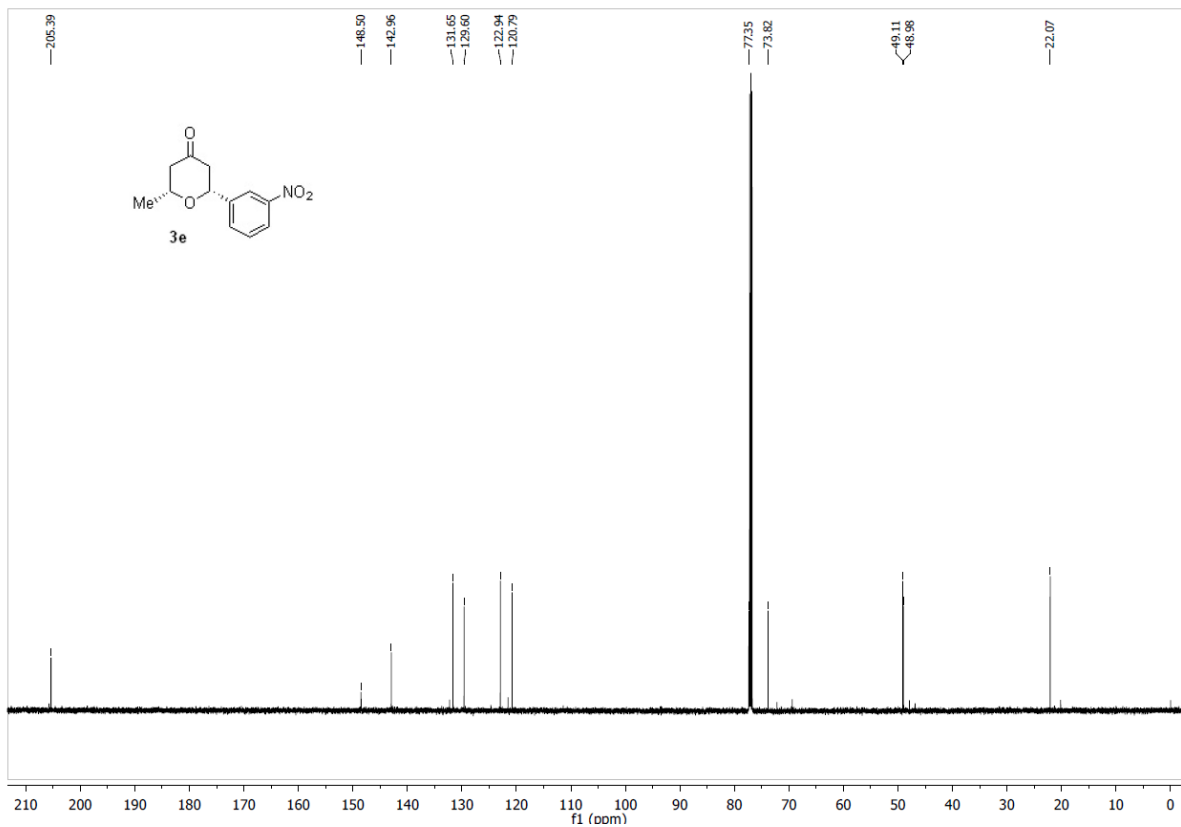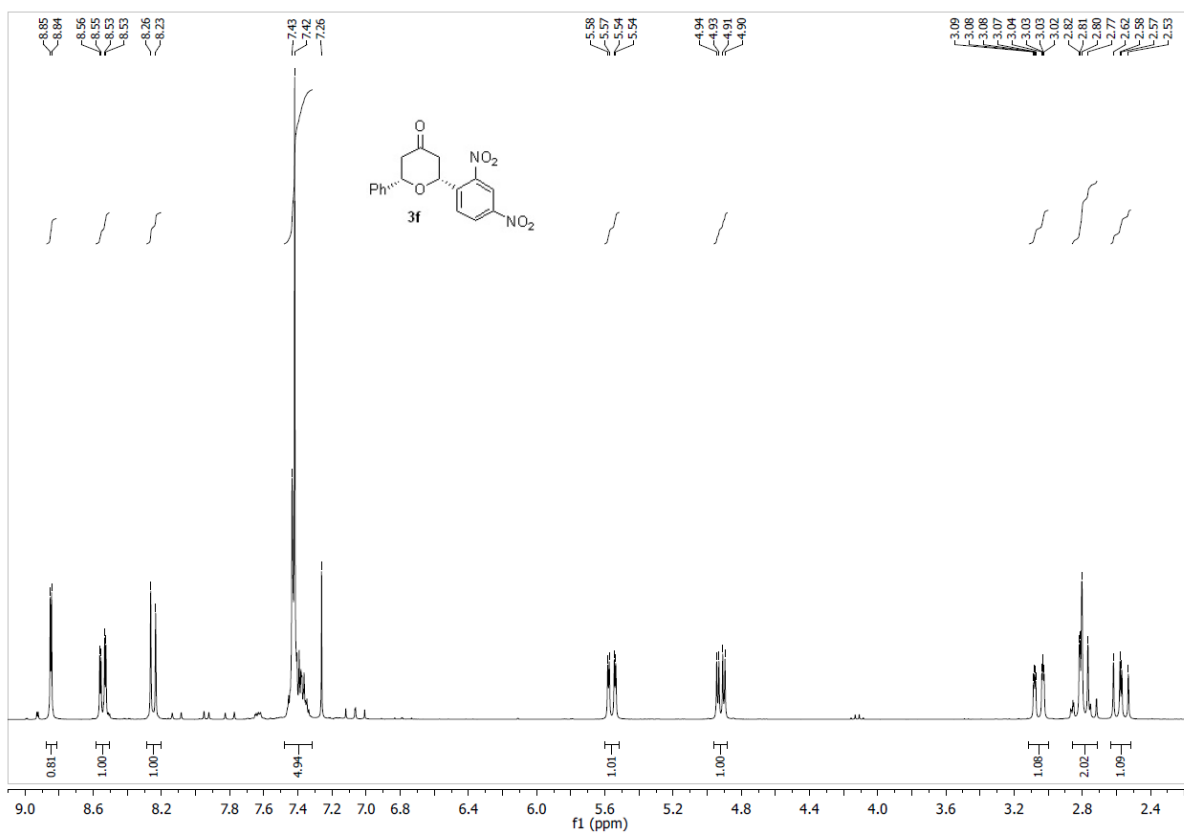

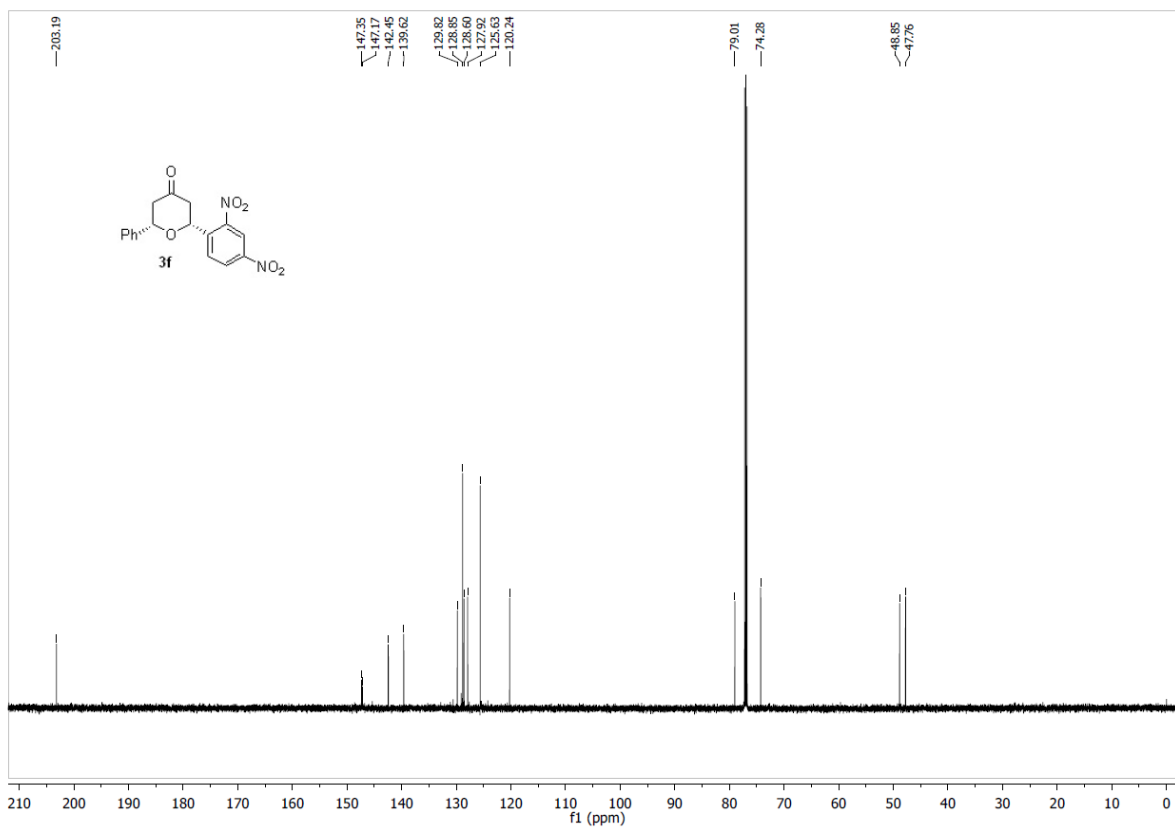

## HPLC data for organocatalytic oxa-Diels-Alder reaction

### Compound **3a**

The enantiomeric excess was determined by HPLC (Chiralpak OD-H column, hexane/*i*-PrOH 80:20, flow rate 1 mL/min;  $t_{\text{minor}} = 28.9$  min,  $t_{\text{major}} = 36.9$  min,  $\lambda = 254$  nm).

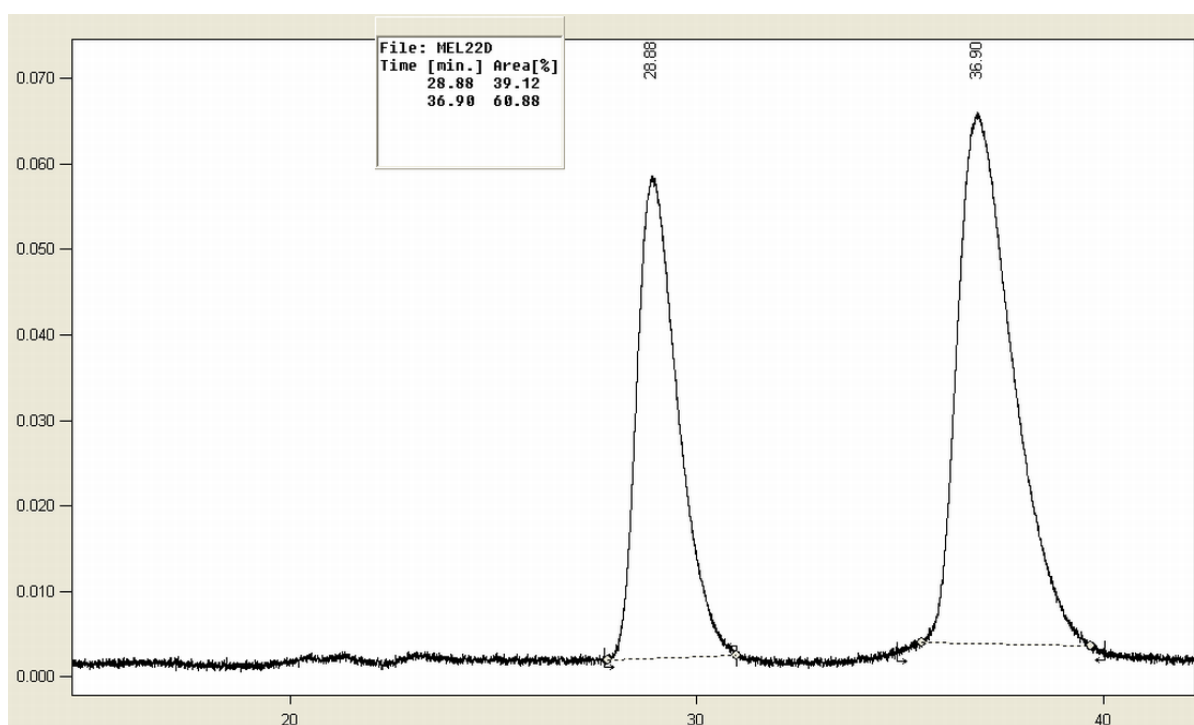

## Flow system details

T-mixer was purchased from Bola (Germany), LFT-MS (Volume 0.2 ml, Channel size 1 mm) was purchased from Little Things Factory (Germany, [www.ltf-gmbh.com](http://www.ltf-gmbh.com)). The residence time units were prepared from Teflon tubing. For heating, the reactors were immersed in a water bath. The feed was pumped using a syringe pump NE-1010 from New Era Pump Systems Inc. ([www.syringepump.com](http://www.syringepump.com)).

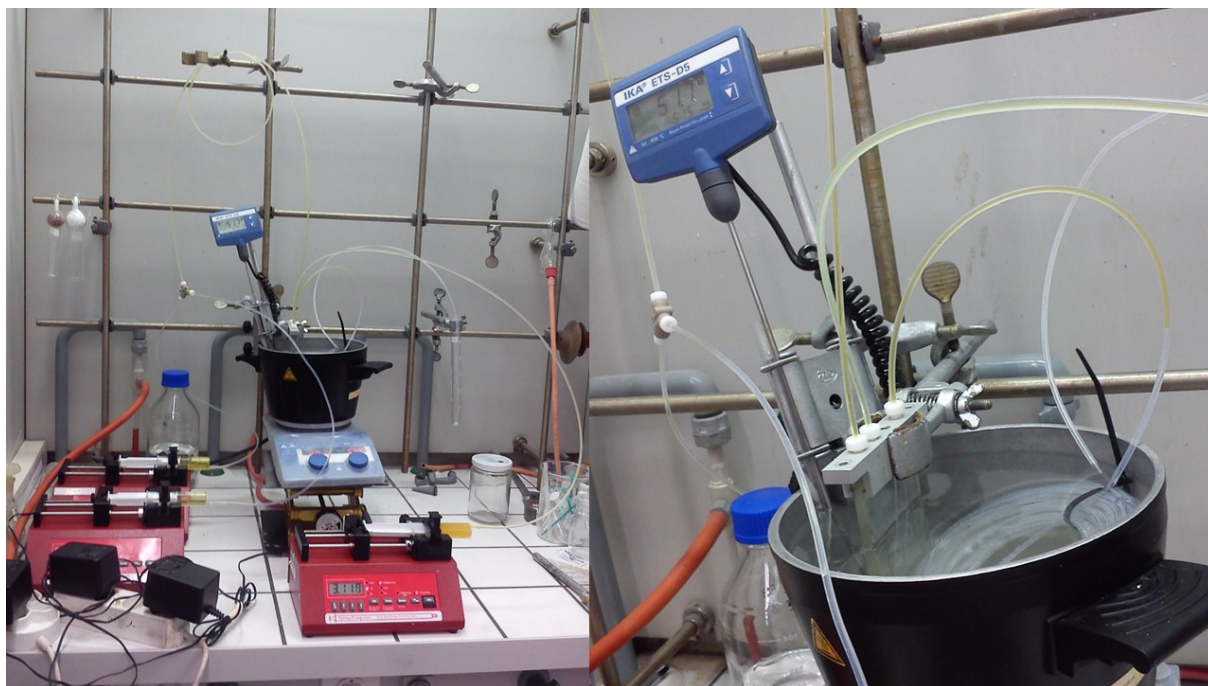

Supplement: c4nj02361g1.pdf [file c4nj02361g1.pdf]
